# Supplementary material for: Residual Inflammation Indicated by High-Sensitivity C-Reactive Protein Predicts Worse Long-Term Clinical Outcomes in Japanese Patients after Percutaneous Coronary Intervention
Source: PubMed Central journal article supplement (PMC7230848; doi:10.3390/jcm9041033), 2020-04-06
Supplement: jcm-09-01033-s001.pdf [file jcm-09-01033-s001.pdf]

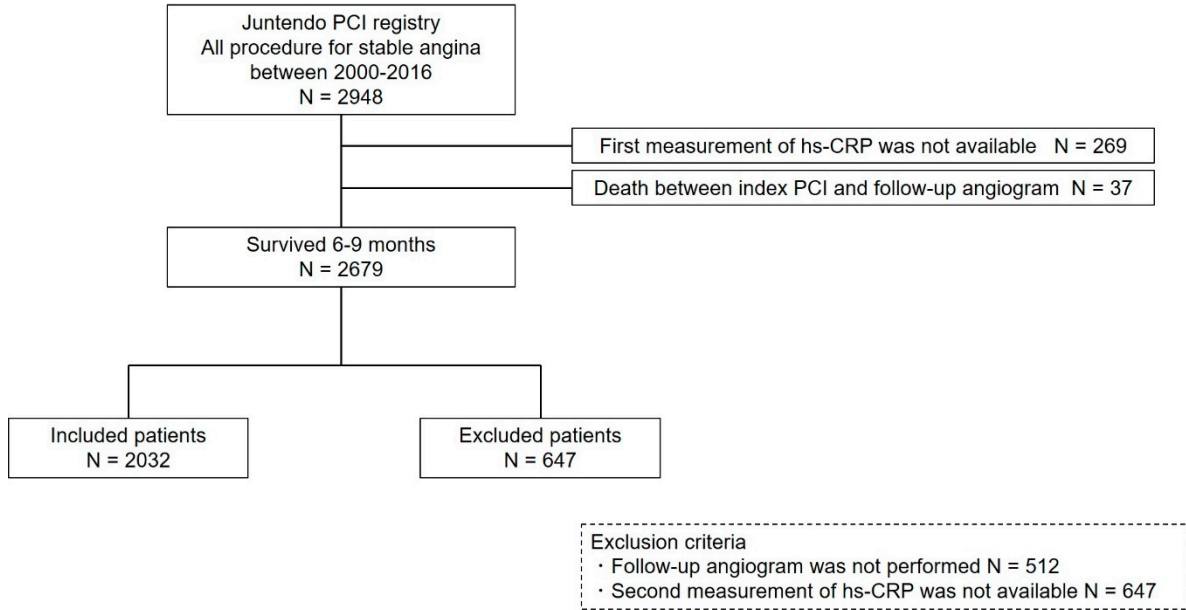

**Supplementary Figure 1. Study flow chart.** PCI, percutaneous coronary intervention; hs-CRP, high-sensitivity C-reactive protein; ACS, acute coronary syndrome; RIR, residual inflammatory risk.

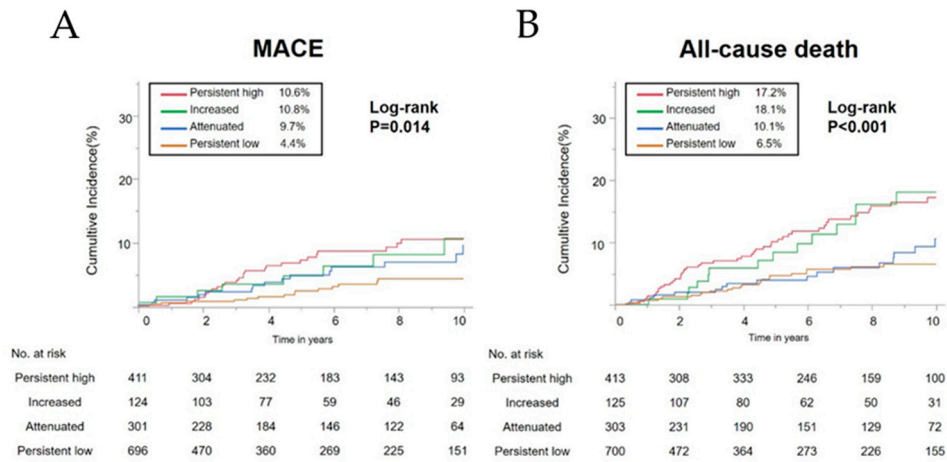

**Supplementary Figure 2. Kaplan-Meier curve for MACE and all-cause death in patients with preserved renal function. (A)** Long-term major adverse cardiovascular events (MACE) (composite endpoint defined as cardiovascular death, non-fatal myocardial infarction, or non-fatal cerebral infarction); **(B)** Long-term all-cause mortality.

Supplementary Table 1. Patients Characteristics.

|                            | Included patients<br>(n = 2032) | Excluded patients<br>(n = 647) | P      |
|----------------------------|---------------------------------|--------------------------------|--------|
| Age, years                 | 66.6 ± 9.7                      | 67.3 ± 10.9                    | 0.11   |
| Male, n(%)                 | 1688(83.1)                      | 535 (82.7)                     | 0.82   |
| LVEF, %                    | 62.7 ± 10.9                     | 62.8 ± 12.9                    | 0.82   |
| Multivessel disease, n (%) | 1215 (60.3)                     | 393 (61.3)                     | 0.65   |
| Hypertension, n(%)         | 1458 (73.1)                     | 471 (72.8)                     | 0.89   |
| CKD, n(%)                  | 483 (23.8)                      | 213 (32.9)                     | <0.001 |
| Dyslipidemia, n(%)         | 1555 (76.5)                     | 484 (74.8)                     | 0.37   |
| Diabetes, n(%)             | 899 (44.2)                      | 290 (44.8)                     | 0.80   |
| eGFR                       | 69.6 ± 17.8                     | 66.1 ± 20.9                    | <0.001 |
| BMI                        | 24.5 ± 3.3                      | 24.2 ± 3.3                     | 0.08   |

LVEF, left ventricular ejection fraction; CKD, chronic kidney disease; eGFR, estimated glomerular filtration rate; BMI, body mass index.
